# Supplementary material for: Diastereoselective Three-Component 1,3-Dipolar Cycloaddition to Access Functionalized β-Tetrahydrocarboline- and Tetrahydroisoquinoline-Fused Spirooxindoles
Source: MDPI journal article supplement (doi:10.3390/molecules29081790), 2024-04-15
Supplement: s1 [file s1]

## *Supplementary Materials*

### Diastereoselective Three-component 1,3-Dipolar Cycloaddition to Access Functionalized $\beta$ -Tetrahydrocarboline and Tetrahydroisoquinoline fused Spirooxindoles

Yongchao Wang <sup>1,\*</sup>, Yu Chen <sup>1</sup>, Shengli Duan <sup>1</sup>, Yiyang Cao<sup>1</sup>, Wenjin Sun <sup>1</sup>, Mei Zhang<sup>1</sup>, Delin Zhao <sup>1</sup>, Donghua Hu <sup>1,\*</sup> and Jian-Wei Dong <sup>2,\*</sup>

<sup>1</sup> College of Vocational and Technical Education, Yunnan Normal University, Kunming 650092, China

<sup>2</sup> College of Chemistry and Environmental Science, Qujing Normal University, Qujing, 655011, China

\* Correspondence:

Yongchao Wang (ycwang@ynnu.edu.cn; yongchaowang126@126.com)

Donghua Hu (hudonghua8888@126.com)

Jianwei Dong (jwdongyn@mail.qjnu.edu.cn)

*Table of contents*

|                                                                                                     |            |
|-----------------------------------------------------------------------------------------------------|------------|
| <b>1. <math>^1\text{H}</math> and <math>^{13}\text{C}</math> NMR spectras for compounds 4 .....</b> | <b>S3</b>  |
| <b>2. <math>^1\text{H}</math> and <math>^{13}\text{C}</math> NMR spectras for compounds 6 .....</b> | <b>S23</b> |
| <b>3. <math>^1\text{H}</math> and <math>^{13}\text{C}</math> NMR spectras for compounds 8 .....</b> | <b>S49</b> |
| <b>4. Single crystal X-ray diffraction study data of compound 4c .....</b>                          | <b>S59</b> |
| <b>5. Single crystal X-ray diffraction study data of compound 6b .....</b>                          | <b>S63</b> |

# 1. $^1\text{H}$ and $^{13}\text{C}$ NMR spectras for compounds 4





2022-109-E DMSO 20221005(101041w)-3200



2022-109-C DMSO 20221005(101041w)-3201



2022-108-H DMSO 20221005(101041w)-3240



2022-108-C DMSO 20221005(101041w)-3241



2022-113-H DMSO 20221005 (101041w)-3190



2022-113-C DMSO 20221005 (101041w)-3191



2022-114-H DMSO 20221005(101041w)-3050



2022-114-C DMSO 20221005(101041w)-3051



2022-115-H DMSO 20221005(101041w)-3220



2022-115-C DMSO 20221005(101041w)-3221



2023-38-H DMSO 202308 (3970)-6040



2023-38-C DMSO 202308 (3970)-4041



2023-41-H DMSO 202308 (3970) -3970



2023-41-C DMSO 202308 (3970) -3971



2023-40-B DMSO 202308 (3970) -3990



2023-40-C DMSO 202308 (3970) -3991



**4k**  
**<sup>1</sup>H-NMR**

Chemical structure of **4k** is shown above the spectrum. The spectrum displays peaks corresponding to the structure, with chemical shifts (ppm) and integration values indicated.

Chemical shifts (ppm): 10.993, 10.816, 10.117, 7.738, 7.720, 7.444, 7.424, 7.418, 7.398, 7.382, 7.326, 7.319, 7.300, 7.298, 7.266, 7.237, 7.219, 7.189, 7.188, 7.113, 7.094, 7.076, 7.016, 6.997, 6.979, 6.977, 6.917, 6.876, 6.873, 6.854, 6.374, 6.125, 6.115, 6.109, 6.096, 5.955, 5.958, 4.825, 4.815, 3.407, 2.808, 2.795, 2.786, 2.777, 2.732, 2.681, 2.663, 2.653, 2.514, 2.510, 2.506, 2.124.

Integration values: 0.03, 1.00, 0.03, 1.00, 0.03, 1.00, 1.04, 2.05, 2.04, 1.02, 1.01, 1.07, 1.06, 1.03, 1.00, 1.00, 1.01, 1.01, 1.00, 1.01, 2.04, 2.03, 3.03.

**4k**  
**<sup>13</sup>C-NMR**

Chemical structure of **4k** is shown. The spectrum displays peaks corresponding to the structure, with labeled chemical shifts (ppm): 177.14, 143.78, 136.52, 134.61, 130.30, 128.14, 128.91, 127.47, 127.28, 126.88, 124.91, 124.23, 123.25, 122.81, 121.43, 118.28, 118.02, 111.98, 111.53, 110.06, 109.46, 108.40, 91.88, 74.70, 60.70, 52.07, 43.28, 40.57, 40.36, 40.15, 39.95, 39.77, 39.53, 39.32, 22.43, 21.56.



2023-15-H DMSO 202305(3740)-3830



2023-15-C DMSO 202305(3740)-3831



2023-20-R DMSO 202305 (3740) -3750



2023-20-C DMSO 202305 (3740) -3751



2022-102-H CDC13 20221005(101041w)-3370



2022-102-C CDC13 20221005(101041w)-3371





2022-112-H DMSO 20221005(101041w)-3150



2022-112-C DMSO 20221005(101041w)-3151



2022-107-H CDC13 20221005(101041w)-3380



2022-107-C CDC13 20221005(101041w)-3381



2022-119-H CDC13 20221005(101041w)-3260



2022-119-C CDC13 20221005(101041w)-3261





## 2. $^1\text{H}$ and $^{13}\text{C}$ NMR spectra for compounds **6**





46-H DMSO 400



46-C DMSO 400





87-H DMSO+CDCl3 400



87-C DMSO+CDCl3 400





71-H DMSO+CDCl<sub>3</sub> 400



71-C DMSO+CDCl<sub>3</sub> 400



47-H DMSO 400



47-C DMSO 400







2021-24-H DMSO 400



2021-24-C DMSO 400









37 DMSO 400



37 DMSO 400





88-II DMSO- $d_6$ +CDCl<sub>3</sub> 400



88-C DMSO- $d_6$ +CDCl<sub>3</sub> 400





40-H DMSO 400



40-C DMSO 400









2021-19-H DMSO 400



2021-19-C DMSO 400









### 3. $^1\text{H}$ and $^{13}\text{C}$ NMR spectra for compounds **8**





2021-64-H in DMSO 202111-1360



2021-64-C in DMSO 202111-1361





<sup>1</sup>H-NMR

8e  
<sup>13</sup>C-NMR



2021-60-H DMSO 400 202111-101041w(2)-1690



2021-60-C DMSO 400 202111-101041w(2)-1691





2021-71-H DMSO-CDCl<sub>3</sub> 400 922-870



2021-71-C DMSO-CDCl<sub>3</sub> 400 922-871





### 3. Single crystal X-ray diffraction study data of compound 4c

## checkCIF/PLATON report

Structure factors have been supplied for datablock(s) exp\_2483\_auto

THIS REPORT IS FOR GUIDANCE ONLY. IF USED AS PART OF A REVIEW PROCEDURE FOR PUBLICATION, IT SHOULD NOT REPLACE THE EXPERTISE OF AN EXPERIENCED CRYSTALLOGRAPHIC REFEREE.

|                         |                |                          |
|-------------------------|----------------|--------------------------|
| No syntax errors found. | CIF dictionary | Interpreting this report |
|-------------------------|----------------|--------------------------|

**Datablock: exp\_2483\_auto**

Bond precision: C-C = 0.0029 Å Wavelength=1.54184 Å

Cell: a=11.1104(2) Å b=7.3378(2) Å c=30.7872(7) Å  
alpha=90° beta=94.451(2)° gamma=90°

Temperature: 100 K

|                | Calculated       | Reported         |
|----------------|------------------|------------------|
| Volume         | 2502.38(10)      | 2502.38(10)      |
| Space group    | P 21/n           | P 1 21/n 1       |
| Hall group     | -P 2yn           | -P 2yn           |
| Moiety formula | C30 H24 Cl N5 O3 | C30 H24 Cl N5 O3 |
| Sum formula    | C30 H24 Cl N5 O3 | C30 H24 Cl N5 O3 |
| Mr             | 537.99           | 537.99           |
| Dx, g cm-3     | 1.428            | 1.428            |
| Z              | 4                | 4                |
| Mu (mm-1)      | 1.715            | 1.715            |
| F000           | 1120.0           | 1120.0           |
| F000'          | 1124.64          |                  |
| h, k, lmax     | 13, 8, 36        | 13, 8, 36        |
| Nref           | 4412             | 4394             |
| Tmin, Tmax     | 0.872, 0.887     | 0.782, 1.000     |
| Tmin'          | 0.872            |                  |

Correction method= # Reported T Limits: Tmin=0.782 Tmax=1.000  
AbsCorr = MULTI-SCAN

Data completeness= 0.996                      Theta (max)= 66.600

```
R(reflections)= 0.0411( 3907)      wR2(reflections)=
S = 1.020                        0.1095( 4394)
Npar= 353
```

---

The following ALERTS were generated. Each ALERT has the format

**test-name\_ALERT\_alert-type\_alert-level.**

Click on the hyperlinks for more details of the test.

---

 **Alert level C**

|                                                                   |              |
|-------------------------------------------------------------------|--------------|
| PLAT420_ALERT_2_C D-H Bond Without Acceptor N009 --H009 .         | Please Check |
| PLAT906_ALERT_3_C Large K Value in the Analysis of Variance ..... | 2.359 Check  |
| PLAT911_ALERT_3_C Missing PCF Refl Between Thmin & STh/L= 0.595   | 19 Report    |

---

 **Alert level G**

|                                                                    |          |
|--------------------------------------------------------------------|----------|
| PLAT007_ALERT_5_G Number of Unrefined Donor-H Atoms .....          | 2 Report |
| PLAT720_ALERT_4_G Number of Unusual/Non-Standard Labels .....      | 63 Note  |
| PLAT793_ALERT_4_G Model has Chirality at C00D (Centro SPGR)        | R Verify |
| PLAT793_ALERT_4_G Model has Chirality at C00E (Centro SPGR)        | R Verify |
| PLAT793_ALERT_4_G Model has Chirality at C00H (Centro SPGR)        | S Verify |
| PLAT793_ALERT_4_G Model has Chirality at C00K (Centro SPGR)        | R Verify |
| PLAT909_ALERT_3_G Percentage of I>2sig(I) Data at Theta(Max) Still | 84% Note |
| PLAT933_ALERT_2_G Number of HKL-OMIT Records in Embedded .res File | 1 Note   |
| PLAT941_ALERT_3_G Average HKL Measurement Multiplicity .....       | 3.6 Low  |
| PLAT978_ALERT_2_G Number C-C Bonds with Positive Residual Density. | 9 Info   |

---

- 0 **ALERT level A** - Most likely a serious problem - resolve or explain  
 0 **ALERT level B** - A potentially serious problem, consider carefully  
 3 **ALERT level C** - Check. Ensure it is not caused by an omission or oversight  
 10 **ALERT level G** = General information/check it is not something unexpected
- 0 ALERT type 1 CIF construction/syntax error, inconsistent or missing data  
 3 ALERT type 2 Indicator that the structure model may be wrong or deficient  
 4 ALERT type 3 Indicator that the structure quality may be low  
 5 ALERT type 4 Improvement, methodology, query or suggestion  
 1 ALERT type 5 Informative message, check
-

It is advisable to attempt to resolve as many as possible of the alerts in all categories. Often the minor alerts point to easily fixed oversights, errors and omissions in your CIF or refinement strategy, so attention to these fine details can be worthwhile. In order to resolve some of the more serious problems it may be necessary to carry out additional measurements or structure refinements. However, the purpose of your study may justify the reported deviations and the more serious of these should normally be commented upon in the discussion or experimental section of a paper or in the "special\_details" fields of the CIF. checkCIF was carefully designed to identify outliers and unusual parameters, but every test has its limitations and alerts that are not important in a particular case may appear. Conversely, the absence of alerts does not guarantee there are no aspects of the results needing attention. It is up to the individual to critically assess their own results and, if necessary, seek expert advice.

### **Publication of your CIF in IUCr journals**

A basic structural check has been run on your CIF. These basic checks will be run on all CIFs submitted for publication in IUCr journals (*Acta Crystallographica*, *Journal of Applied Crystallography*, *Journal of Synchrotron Radiation*); however, if you intend to submit to *Acta Crystallographica Section C* or *E* or *IUCrData*, you should make sure that full publication checks are run on the final version of your CIF prior to submission.

### **Publication of your CIF in other journals**

Please refer to the *Notes for Authors* of the relevant journal for any special instructions relating to CIF submission.

---

**PLATON version of 12/09/2022; check.def file version of 09/08/2022**

Datafile exp\_2483\_outo - c1qnsd plot



#### 4. Single crystal X-ray diffraction study data of compound 6b

## checkCIF/PLATON report

Structure factors have been supplied for datablock(s) exp\_2413\_auto

THIS REPORT IS FOR GUIDANCE ONLY. IF USED AS PART OF A REVIEW PROCEDURE FOR PUBLICATION, IT SHOULD NOT REPLACE THE EXPERTISE OF AN EXPERIENCED CRYSTALLOGRAPHIC REFEREE.

No syntax errors found.      CIF dictionary      Interpreting this report

## Datablock: exp\_2413\_auto

|                 |                                |                                |                                 |
|-----------------|--------------------------------|--------------------------------|---------------------------------|
| Bond precision: | C-C = 0.0013 Å                 | Wavelength=0.71073             |                                 |
| Cell:           | a=9.3321(2)<br>alpha=67.455(2) | b=11.1799(2)<br>beta=88.693(2) | c=12.8313(3)<br>gamma=86.534(2) |
| Temperature:    | 100 K                          |                                |                                 |
|                 | Calculated                     | Reported                       |                                 |
| Volume          | 1234.15(5)                     | 1234.15(5)                     |                                 |
| Space group     | P -1                           | P -1                           |                                 |
| Hall group      | -P 1                           | -P 1                           |                                 |
| Moiety formula  | C28 H24 N4 O3, C H4 O          | C28 H24 N4 O3, C H4 O          |                                 |
| Sum formula     | C29 H28 N4 O4                  | C29 H28 N4 O4                  |                                 |
| Mr              | 496.55                         | 496.55                         |                                 |
| Dx, g cm-3      | 1.336                          | 1.336                          |                                 |
| Z               | 2                              | 2                              |                                 |
| Mu (mm-1)       | 0.091                          | 0.091                          |                                 |
| F000            | 524.0                          | 524.0                          |                                 |
| F000'           | 524.23                         |                                |                                 |
| h, k, lmax      | 15, 18, 21                     | 14, 17, 20                     |                                 |
| Nref            | 11542                          | 10382                          |                                 |
| Tmin, Tmax      | 0.984, 0.991                   | 0.901, 1.000                   |                                 |
| Tmin'           | 0.973                          |                                |                                 |

```
Correction method= # Reported T Limits: Tmin=0.901 Tmax=1.000
AbsCorr = MULTI-SCAN
```

Data completeness= 0.899                      Theta(max)= 35.812

```
R(reflections)= 0.0440( 8251)      wR2(reflections)=
                                0.1328( 10382)
S = 1.070                        Npar= 337
```

---

The following ALERTS were generated. Each ALERT has the format

**test-name\_ALERT\_alert-type\_alert-level.**

Click on the hyperlinks for more details of the test.

---



#### Alert level C

PLAT230\_ALERT\_2\_C Hirshfeld Test Diff for N007 --C00R . 6.2 s.u.

---



#### Alert level G

|                   |                                                  |       |        |
|-------------------|--------------------------------------------------|-------|--------|
| PLAT007_ALERT_5_G | Number of Unrefined Donor-H Atoms .....          | 3     | Report |
| PLAT154_ALERT_1_G | The s.u.'s on the Cell Angles are Equal ..(Note) | 0.002 | Degree |
| PLAT720_ALERT_4_G | Number of Unusual/Non-Standard Labels .....      | 65    | Note   |
| PLAT793_ALERT_4_G | Model has Chirality at C00G (Centro SPGR)        | R     | Verify |
| PLAT793_ALERT_4_G | Model has Chirality at C00K (Centro SPGR)        | R     | Verify |
| PLAT793_ALERT_4_G | Model has Chirality at C00P (Centro SPGR)        | R     | Verify |
| PLAT793_ALERT_4_G | Model has Chirality at C00R (Centro SPGR)        | R     | Verify |
| PLAT910_ALERT_3_G | Missing # of FCF Reflection(s) Below Theta(Min). | 3     | Note   |
| PLAT912_ALERT_4_G | Missing # of FCF Reflections Above STh/L= 0.600  | 1052  | Note   |
| PLAT933_ALERT_2_G | Number of HKL-OMIT Records in Embedded .res File | 2     | Note   |
| PLAT941_ALERT_3_G | Average HKL Measurement Multiplicity .....       | 2.9   | Low    |
| PLAT978_ALERT_2_G | Number C-C Bonds with Positive Residual Density. | 24    | Info   |

---

- 0 **ALERT level A** - Most likely a serious problem - resolve or explain  
 0 **ALERT level B** - A potentially serious problem, consider carefully  
 1 **ALERT level C** - Check. Ensure it is not caused by an omission or oversight  
 12 **ALERT level G** = General information/check it is not something unexpected
- 1 ALERT type 1 CIF construction/syntax error, inconsistent or missing data  
 3 ALERT type 2 Indicator that the structure model may be wrong or deficient  
 2 ALERT type 3 Indicator that the structure quality may be low  
 6 ALERT type 4 Improvement, methodology, query or suggestion  
 1 ALERT type 5 Informative message, check
-

It is advisable to attempt to resolve as many as possible of the alerts in all categories. Often the minor alerts point to easily fixed oversights, errors and omissions in your CIF or refinement strategy, so attention to these fine details can be worthwhile. In order to resolve some of the more serious problems it may be necessary to carry out additional measurements or structure refinements. However, the purpose of your study may justify the reported deviations and the more serious of these should normally be commented upon in the discussion or experimental section of a paper or in the "special\_details" fields of the CIF. checkCIF was carefully designed to identify outliers and unusual parameters, but every test has its limitations and alerts that are not important in a particular case may appear. Conversely, the absence of alerts does not guarantee there are no aspects of the results needing attention. It is up to the individual to critically assess their own results and, if necessary, seek expert advice.

#### **Publication of your CIF in IUCr journals**

A basic structural check has been run on your CIF. These basic checks will be run on all CIFs submitted for publication in IUCr journals (*Acta Crystallographica*, *Journal of Applied Crystallography*, *Journal of Synchrotron Radiation*); however, if you intend to submit to *Acta Crystallographica Section C* or *E* or *IUCrData*, you should make sure that full publication checks are run on the final version of your CIF prior to submission.

#### **Publication of your CIF in other journals**

Please refer to the *Notes for Authors* of the relevant journal for any special instructions relating to CIF submission.

---

**PLATON version of 12/09/2022; check.def file version of 09/08/2022**

Datablock exp\_2413\_auto : cliporid plot
